# Supplementary material for: Establishment of Flavonoid Fingerprint of TMR Diet and Optimization Factor Analysis Strategy and In Vitro Fermentation Parameters Based on Spectrum–Effect Relationship
Source: MDPI journal article supplement (doi:10.3390/fermentation9060571), 2023-06-16
Supplement: s1 [file s1]

**Table S1** Composition and nutrient levels of the basal diet

| Sample | Moisture% | Dry matter% | Crude fat % | Coarse ash % | Crude protein % | Neutral washing fiberNDF % | Acid washing fiberADF % |
|--------|-----------|-------------|-------------|--------------|-----------------|----------------------------|-------------------------|
| S1     | 44.76     | 97.81       | 3.66        | 10.60        | 18.23           | 26.02                      | 12.21                   |
| S2     | 54.78     | 98.03       | 4.33        | 10.90        | 18.13           | 34.21                      | 15.97                   |
| S3     | 50.64     | 97.86       | 4.11        | 10.55        | 19.13           | 33.61                      | 13.23                   |
| S4     | 46.79     | 97.70       | 4.61        | 6.72         | 18.20           | 33.48                      | 14.77                   |
| S5     | 46.15     | 97.83       | 4.03        | 9.74         | 18.38           | 27.47                      | 13.71                   |
| S6     | 49.83     | 97.85       | 3.84        | 9.75         | 17.64           | 30.52                      | 13.74                   |
| S7     | 56.31     | 97.67       | 3.84        | 8.87         | 17.43           | 28.38                      | 11.04                   |
| S8     | 52.28     | 97.40       | 3.31        | 9.60         | 17.32           | 27.63                      | 12.34                   |
| S9     | 50.90     | 97.54       | 3.90        | 8.06         | 18.50           | 27.78                      | 10.18                   |
| S10    | 41.02     | 97.78       | 4.95        | 10.08        | 18.83           | 29.34                      | 12.99                   |
| S11    | 46.33     | 97.67       | 4.87        | 9.35         | 17.82           | 35.45                      | 11.43                   |
| S12    | 49.03     | 97.71       | 4.66        | 8.83         | 18.59           | 27.71                      | 11.95                   |
| S13    | 51.83     | 97.16       | 2.01        | 7.81         | 17.17           | 42.67                      | 25.81                   |
| S14    | 64.02     | 96.71       | 4.81        | 6.78         | 14.38           | 54.68                      | 25.89                   |
| S15    | 46.26     | 97.16       | 4.16        | 8.60         | 17.40           | 32.30                      | 19.25                   |
| S16    | 43.26     | 97.09       | 3.25        | 8.13         | 18.14           | 36.56                      | 20.51                   |
| S17    | 53.77     | 97.08       | 2.05        | 8.25         | 16.97           | 38.44                      | 17.46                   |
| S18    | 48.32     | 97.31       | 4.33        | 9.98         | 17.87           | 36.52                      | 16.33                   |
| S19    | 51.44     | 96.74       | 2.98        | 8.93         | 19.19           | 31.36                      | 22.92                   |
| S20    | 51.55     | 96.83       | 3.82        | 7.16         | 18.07           | 41.34                      | 18.71                   |

**Table S2** Composition and nutrient levels of the basal diet

| Item                  | component                   | content  |
|-----------------------|-----------------------------|----------|
| Microelement solution | CaCl $\cdot$ 2H $_2$ O      | 13.2g    |
|                       | MnCl $_2\cdot$ 4H $_2$ O    | 10.0g    |
|                       | CoCl $_2\cdot$ 6H $_2$ O    | 1.0 g    |
|                       | FeCl $_3\cdot$ 6H $_2$ O    | 8.0g     |
|                       | Distilled water             | 100 mL   |
| Buffer bicarbonate    | NH $_4$ HCO $_3$            | 4.0g     |
|                       | NaHCO $_3$                  | 35.0 g   |
|                       | Distilled water             | 1000 mL  |
| Phosphate buffer      | Na $_2$ HPO $_4$            | 5.7 g    |
|                       | KH $_2$ PO $_4$             | 6.2 g    |
|                       | MgSO $_4\cdot$ H $_2$ O     | 0.6g     |
|                       | Distilled water             | 1 000 mL |
| Indicator             | Resazurin                   | 0.1g     |
|                       | Distilled water             | 100mL    |
| Reduction solution    | NaOH                        | 160 mg   |
|                       | Na $_2$ S $\cdot$ 9H $_2$ O | 625 mg   |
|                       | Distilled water             | 100 mL   |

**Table S3** PanelOLS Estimation Summary

|                    | Before optimization |              |          |                 | After optimization |                    |                    |                    |
|--------------------|---------------------|--------------|----------|-----------------|--------------------|--------------------|--------------------|--------------------|
|                    | R-squared:          | F-statistic: | P-value: | Log-likelihood: | R-squared:         | F-statistic:       | P-value:           | Log-likelihood:    |
| pH                 | 0.7293              | 1.2434       | 0.4159   | 73.809          | 0.4599             | 4.5409             | 0.0174*            | 66.902             |
| Dry matter         | 0.9235              | 5.5697       | 0.0224*  | -32.056         | 0.6173             | 13.712             | 0.0003*            | -48.152            |
| disappearance rate |                     |              |          |                 |                    |                    |                    |                    |
| NH <sub>3</sub> -N | 0.9499              | 8.746        | 0.0071*  | -48.936         | 0.4309             | 6.4365             | 0.0083*            | -73.23             |
| Acetate            | 0.7637              | 1.4918       | 0.3243   | -47.485         | 0.5549             | 3.4914             | 0.0294*            | -53.817            |
| Propionate         | 0.7485              | 1.3733       | 0.3647   | -32.413         | 0.2631             | 3.0343             | 0.0747             | -43.162            |
| Isobutyrate        | 0.5647              | 0.5986       | 0.7942   | 19.301          | Unable<br>optimize | Unable<br>optimize | Unable<br>optimize | Unable<br>optimize |
| Butyrate           | 0.7598              | 1.4598       | 0.3347   | -19.689         | 0.2195             | 2.39               | 0.1217             | -31.473            |
| Isovalerate        | 0.6232              | 0.7633       | 0.6805   | 6.3232          | 0.3121             | 2.4203             | 0.1039             | 0.305              |
| Valerate           | 0.5109              | 0.4821       | 0.8728   | 13.111          | Unable<br>optimize | Unable<br>optimize | Unable<br>optimize | Unable<br>optimize |

\* Means  $p < 0.05$ .

**Table S4** Moudle Parameter Summary before and after PanelOLS

|               |                     |           | const   | P1     | P2    | P3     | P4    | P5    | P6     | P7    | P8    | P9     | P10   | P11    | P12   | P13    |
|---------------|---------------------|-----------|---------|--------|-------|--------|-------|-------|--------|-------|-------|--------|-------|--------|-------|--------|
| pH            | Before optimization | Parameter | 6.72    | -0.08  | 0.00  | -0.03  | -0.01 | 0.16  | 0.00   | 0.01  | -0.05 | 0.04   | -0.10 | 0.03   | -0.02 | -0.02  |
|               |                     | Std. Err. | 0.03    | 0.07   | 0.03  | 0.02   | 0.02  | 0.11  | 0.01   | 0.03  | 0.05  | 0.10   | 0.11  | 0.04   | 0.03  | 0.08   |
|               |                     | T-stat    | 267.79  | -1.19  | -0.09 | -1.60  | -0.57 | 1.48  | 0.34   | 0.16  | -0.93 | 0.38   | -0.99 | 0.75   | -0.63 | -0.30  |
|               |                     | P-value   | 0.00    | 0.28   | 0.93  | 0.16   | 0.59  | 0.19  | 0.74   | 0.88  | 0.39  | 0.72   | 0.36  | 0.48   | 0.55  | 0.78   |
|               | After optimization  | Parameter | 6.69    | -0.05  |       |        |       | 0.03  |        |       |       |        |       |        | -0.01 |        |
|               |                     | Std. Err. | 0.01    | 0.02   |       |        |       | 0.01  |        |       |       |        |       |        | 0.01  |        |
|               |                     | T-stat    | 1092.10 | -3.10  |       |        |       | 2.39  |        |       |       |        |       |        | -2.33 |        |
|               |                     | P-value   | 0.00    | 0.01   |       |        |       | 0.03  |        |       |       |        |       |        | 0.03  |        |
| disappearance | Before optimization | Parameter | 57.45   | -26.23 | 15.38 | 0.69   | -9.26 | 29.98 | 1.26   | 6.48  | 9.63  | -53.08 | 53.65 | 24.71  | -3.15 | 35.16  |
|               |                     | Std. Err. | 4.99    | 13.99  | 5.47  | 3.48   | 4.36  | 21.05 | 2.60   | 6.75  | 10.54 | 19.17  | 21.06 | 7.96   | 5.90  | 16.42  |
|               |                     | T-stat    | 11.51   | -1.87  | 2.81  | 0.20   | -2.12 | 1.42  | 0.49   | 0.96  | 0.91  | -2.77  | 2.55  | 3.10   | -0.53 | 2.14   |
|               |                     | P-value   | 0.00    | 0.11   | 0.03  | 0.85   | 0.08  | 0.20  | 0.64   | 0.37  | 0.40  | 0.03   | 0.04  | 0.02   | 0.61  | 0.08   |
|               | After optimization  | Parameter | 63.02   |        |       |        |       |       |        |       |       |        |       | 26.82  |       | 9.65   |
|               |                     | Std. Err. | 1.97    |        |       |        |       |       |        |       |       |        |       | 7.45   |       | 2.99   |
|               |                     | T-stat    | 32.03   |        |       |        |       |       |        |       |       |        |       | 3.60   |       | 3.23   |
|               |                     | P-value   | 0.00    |        |       |        |       |       |        |       |       |        |       | 0.00   |       | 0.00   |
| NH3-N         | Before optimization | Parameter | 47.87   | -24.08 | -4.45 | -17.96 | 2.84  | 56.88 | -16.55 | -4.27 | 67.30 | 64.57  | 1.80  | -29.57 | -4.53 | -65.78 |
|               |                     | Std. Err. | 11.61   | 32.54  | 12.73 | 8.09   | 10.15 | 48.95 | 6.04   | 15.70 | 24.51 | 44.59  | 48.97 | 18.51  | 13.71 | 38.18  |
|               |                     | T-stat    | 4.12    | -0.74  | -0.35 | -2.22  | 0.28  | 1.16  | -2.74  | -0.27 | 2.75  | 1.45   | 0.04  | -1.60  | -0.33 | -1.72  |
|               |                     | P-value   | 0.01    | 0.49   | 0.74  | 0.07   | 0.79  | 0.29  | 0.03   | 0.79  | 0.03  | 0.20   | 0.97  | 0.16   | 0.75  | 0.14   |

|             |                        |           |       |       |        |       |      |       |       |        |        |       |         |        |       |        |
|-------------|------------------------|-----------|-------|-------|--------|-------|------|-------|-------|--------|--------|-------|---------|--------|-------|--------|
|             | After<br>optimization  | Parameter | 24.88 |       |        |       |      |       |       | -13.31 |        | 70.77 |         |        |       |        |
|             |                        | Std. Err. | 5.11  |       |        |       |      |       |       | 4.42   |        | 29.22 |         |        |       |        |
|             |                        | T-stat    | 4.87  |       |        |       |      |       |       | -3.01  |        | 2.42  |         |        |       |        |
|             |                        | P-value   | 0.00  |       |        |       |      |       |       | 0.01   |        | 0.03  |         |        |       |        |
| Acetate     | Before<br>optimization | Parameter | 64.45 | 9.66  | -16.06 | -9.97 | 5.02 | 1.55  | 13.91 | -26.62 | -20.56 | 77.89 | -100.07 | 0.30   | 7.02  | -33.39 |
|             |                        | Std. Err. | 10.80 | 30.26 | 11.84  | 7.52  | 9.44 | 45.53 | 5.62  | 14.60  | 22.80  | 41.47 | 45.55   | 17.21  | 12.75 | 35.51  |
|             |                        | T-stat    | 5.97  | 0.32  | -1.36  | -1.33 | 0.53 | 0.03  | 2.48  | -1.82  | -0.90  | 1.88  | -2.20   | 0.02   | 0.55  | -0.94  |
|             |                        | P-value   | 0.00  | 0.76  | 0.22   | 0.23  | 0.61 | 0.97  | 0.05  | 0.12   | 0.40   | 0.11  | 0.07    | 0.99   | 0.60  | 0.38   |
|             | After<br>optimization  | Parameter | 51.58 |       |        |       |      |       |       | 8.65   | -14.04 |       | 43.52   | -61.39 |       |        |
|             |                        | Std. Err. | 5.20  |       |        |       |      |       |       | 4.14   | 6.34   |       | 11.46   | 24.18  |       |        |
|             |                        | T-stat    | 9.92  |       |        |       |      |       |       | 2.09   | -2.22  |       | 3.80    | -2.54  |       |        |
|             |                        | P-value   | 0.00  |       |        |       |      |       |       | 0.06   | 0.04   |       | 0.00    | 0.02   |       |        |
| Propionate  | Before<br>optimization | Parameter | 29.58 | 7.86  | -8.83  | -3.84 | 3.41 | -4.97 | 6.00  | -12.61 | -8.40  | 40.96 | -47.19  | 0.14   | 3.63  | -19.22 |
|             |                        | Std. Err. | 5.08  | 14.24 | 5.57   | 3.54  | 4.44 | 21.43 | 2.64  | 6.87   | 10.73  | 19.52 | 21.44   | 8.10   | 6.00  | 16.72  |
|             |                        | T-stat    | 5.82  | 0.55  | -1.59  | -1.08 | 0.77 | -0.23 | 2.27  | -1.84  | -0.78  | 2.10  | -2.20   | 0.02   | 0.61  | -1.15  |
|             |                        | P-value   | 0.00  | 0.60  | 0.16   | 0.32  | 0.47 | 0.82  | 0.06  | 0.12   | 0.46   | 0.08  | 0.07    | 0.99   | 0.57  | 0.29   |
|             | After<br>optimization  | Parameter | 18.67 |       |        |       |      |       |       |        |        |       | 12.83   |        |       |        |
|             |                        | Std. Err. | 1.30  |       |        |       |      |       |       |        |        |       | 5.21    |        |       |        |
|             |                        | T-stat    | 14.38 |       |        |       |      |       |       |        |        |       | 2.46    |        |       |        |
|             |                        | P-value   | 0.00  |       |        |       |      |       |       |        |        |       | 0.02    |        |       |        |
| Isobutyrate | Before<br>optimization | Parameter | 1.82  | 1.12  | -0.59  | -0.04 | 0.39 | -1.49 | 0.24  | -0.92  | -0.11  | 1.49  | -2.80   | -0.41  | 0.54  | -1.28  |
|             |                        | Std. Err. | 0.38  | 1.07  | 0.42   | 0.27  | 0.33 | 1.61  | 0.20  | 0.52   | 0.81   | 1.47  | 1.62    | 0.61   | 0.45  | 1.26   |
|             |                        | T-stat    | 4.76  | 1.04  | -1.41  | -0.15 | 1.15 | -0.92 | 1.22  | -1.78  | -0.14  | 1.01  | -1.73   | -0.68  | 1.19  | -1.02  |

|             |                     |           |       |      |       |       |      |       |      |       |       |       |        |       |      |        |
|-------------|---------------------|-----------|-------|------|-------|-------|------|-------|------|-------|-------|-------|--------|-------|------|--------|
|             |                     | P-value   | 0.00  | 0.34 | 0.21  | 0.88  | 0.29 | 0.39  | 0.27 | 0.13  | 0.89  | 0.35  | 0.13   | 0.52  | 0.28 | 0.35   |
|             | After optimization  | Parameter |       |      |       |       |      |       |      |       |       |       |        |       |      |        |
|             |                     | Std. Err. |       |      |       |       |      |       |      |       |       |       |        |       |      |        |
|             |                     | T-stat    |       |      |       |       |      |       |      |       |       |       |        |       |      |        |
|             |                     | P-value   |       |      |       |       |      |       |      |       |       |       |        |       |      |        |
| Butyrate    | Before optimization | Parameter | 15.67 | 5.24 | -5.93 | -2.40 | 2.72 | -4.94 | 2.44 | -7.30 | -4.95 | 23.40 | -26.05 | -1.07 | 2.34 | -11.45 |
|             |                     | Std. Err. | 2.69  | 7.54 | 2.95  | 1.87  | 2.35 | 11.34 | 1.40 | 3.64  | 5.68  | 10.33 | 11.35  | 4.29  | 3.18 | 8.85   |
|             |                     | T-stat    | 5.83  | 0.70 | -2.01 | -1.28 | 1.16 | -0.44 | 1.74 | -2.01 | -0.87 | 2.26  | -2.30  | -0.25 | 0.74 | -1.29  |
|             |                     | P-value   | 0.00  | 0.51 | 0.09  | 0.25  | 0.29 | 0.68  | 0.13 | 0.09  | 0.42  | 0.06  | 0.06   | 0.81  | 0.49 | 0.24   |
|             | After optimization  | Parameter | 9.31  |      |       | -0.88 |      |       |      |       |       | 6.20  |        |       |      |        |
|             |                     | Std. Err. | 0.72  |      |       | 0.47  |      |       |      |       |       | 2.90  |        |       |      |        |
|             |                     | T-stat    | 12.85 |      |       | -1.86 |      |       |      |       |       | 2.14  |        |       |      |        |
|             |                     | P-value   | 0.00  |      |       | 0.08  |      |       |      |       |       | 0.05  |        |       |      |        |
| Isovalerate | Before optimization | Parameter | 3.46  | 0.69 | -1.13 | -0.35 | 0.44 | -0.94 | 0.30 | -1.04 | -0.43 | 3.48  | -3.49  | -1.01 | 0.54 | -2.15  |
|             |                     | Std. Err. | 0.73  | 2.05 | 0.80  | 0.51  | 0.64 | 3.09  | 0.38 | 0.99  | 1.55  | 2.81  | 3.09   | 1.17  | 0.87 | 2.41   |
|             |                     | T-stat    | 4.72  | 0.33 | -1.41 | -0.69 | 0.69 | -0.31 | 0.78 | -1.05 | -0.28 | 1.24  | -1.13  | -0.86 | 0.63 | -0.89  |
|             |                     | P-value   | 0.00  | 0.75 | 0.21  | 0.52  | 0.51 | 0.77  | 0.47 | 0.33  | 0.79  | 0.26  | 0.30   | 0.42  | 0.55 | 0.41   |
|             | After optimization  | Parameter | 2.59  |      | -0.40 | -0.18 |      |       |      |       |       | 1.30  |        |       |      |        |
|             |                     | Std. Err. | 0.19  |      | 0.18  | 0.10  |      |       |      |       |       | 0.64  |        |       |      |        |
|             |                     | T-stat    | 13.94 |      | -2.25 | -1.79 |      |       |      |       |       | 2.03  |        |       |      |        |
|             |                     | P-value   | 0.00  |      | 0.04  | 0.09  |      |       |      |       |       | 0.06  |        |       |      |        |
| Valerate    | Before optimization | Parameter | 3.72  | 1.36 | -0.95 | -0.17 | 0.57 | -1.68 | 0.28 | -1.23 | -0.39 | 2.27  | -3.18  | -0.10 | 0.55 | -1.84  |
|             |                     | Std. Err. | 0.52  | 1.46 | 0.57  | 0.36  | 0.46 | 2.20  | 0.27 | 0.71  | 1.10  | 2.00  | 2.20   | 0.83  | 0.62 | 1.72   |

[illegible]
